1  
2  
3  
4  
5  
6  
7  
8  
9  
10  
11

12 **Sensory nutrition: The role of taste in the reviews of commercial food products**

13

14 Danielle R. Reed, Joel D. Mainland, and Charles J. Arayata

15 Monell Chemical Senses Center, Philadelphia, PA 19104

16

17

18

19

20

21 Please address correspondence to:

22 Danielle R. Reed, Ph.D.

23 Associate Director

24 Monell Chemical Senses Center

25 Philadelphia PA 19104

26 a

27 Abstract

28 Many factors play a role in choosing what to eat or drink. Here we explored the role of  
29 sensation to explain these differences, drawing on consumer reviews for commercially available  
30 food products sold through an online retailer. We analyzed 393,568 unique food product  
31 reviews from Amazon customers with a total of 256,043 reviewers rating 67,553 products. Taste-  
32 associated words were mentioned more than words associated with cost, food texture, customer  
33 service, nutrition, smell, or those referring to the trigeminal senses, e.g., spicy. We computed the  
34 overall number of reviews that mentioned taste qualities: the word *taste* was mentioned in over  
35 30% of the reviews (N= 142,768), followed by *sweet* (10.7%, N=42,315), *bitter* (2.9%, N=11,424),  
36 *sour* (2.1%, N=8,252), and *salty* (1.4%, N=5,688). We identified 38 phrases used to describe the  
37 evaluation of sweetness, finding that ‘too sweet’ was used in nearly 0.8% of the reviews and  
38 oversweetness was mentioned over 25 times more often than under-sweetness. We then focused  
39 on ‘polarizing’ products, those that elicited a wide difference of opinion (as measured by the  
40 ranges of the product ratings). Using the products that had more than 50 reviews, we identified  
41 the top 10 most polarizing foods (i.e., those with the largest standard deviation in ratings) and  
42 provide representative comments about the polarized taste experience of consumers. Overall,  
43 these results support the primacy of taste in real-world food ratings and individualized taste  
44 experience, such as whether a product is ‘too sweet’. Analysis of consumer review data sets can  
45 provide information about purchasing decisions and customer sensory responses to particular  
46 commercially available products and represents a promising methodology for the emerging  
47 field of sensory nutrition.

48 Keywords: taste, sweetness, bitterness, consumers, segmentation

49

50 'Sensory nutrition' is a research area examining how sensation affects what an animal (person)

51 chooses to eat or drink and how these sensory-motivated choices affect their nutritional health.

52 However, many studies that fall into the 'sensory-nutrition' study arena analyze these processes

53 under artificial circumstances, e.g., one meal or one snack in the laboratory. Here we capitalize

54 on real human behavior in a large arena of food choice, an on-line retailer that offers thousands

55 of choices, examining the importance of sensory experience in the written comments of those

56 who have purchased foods and drinks.

57 Sensory nutrition as a research area has become more essential because of the increasing

58 realization that human foods have become 'hyperpalatable', engineered to make them so

59 desirable from a sensory perspective that they are hard to resist and the overeating of these

60 foods leads to obesity and other disease associated with overconsumption. However, while

61 taste is often studied in simplified foods systems, like sugar dissolved in plain water [1], real-

62 world foods are rarely evaluated for taste in a choice context in laboratories studies, although

63 these types of studies are commonly done to evaluate products for the marketplace. Most

64 broadly, the assertion is that the taste of foods drives overconsumption but that people differ in

65 their perception. The larger question is whether personal differences in taste experience for

66 different foods drive overconsumption of that food, and can ultimately predict who will not

67 only like a certain food, but perhaps who cannot resist that food and why.

68 We took a step toward this larger question by analyzing how the sense of taste factors into food

69 ratings by examining reviews of commercial foods written by customers of an online retailer.

70 These ratings contain both a text narrative about the food and a ‘star’ rating, from one to five,  
71 with five stars representing the highest score. We were interested in how often taste was  
72 mentioned by reviewers and which of the taste qualities were mentioned most often. We were  
73 also interested in the idea that certain products were more polarizing among reviewers, with  
74 extreme diversity—love it or hate it—in responses, reasoning that a list of polarizing products  
75 might be a tool for future research to understand food choice. We extract and present reviewer  
76 comments about polarizing food products to illustrate what role taste played in creating the  
77 diverse viewpoints. We contrasted taste-specific works with those for texture (e.g., lumpy,  
78 creamy, soft, hard) and odor (e.g., smell) as well as price and customer service to see what  
79 sensory words were more common among reviewers.

## 80 **Methods**

81 **Data and its structure.** We obtained the data set through the open-source data competition site  
82 Kaggle ([www.kaggle.com](http://www.kaggle.com)), where the data are offered freely to all under a Creative Commons  
83 public license. We performed all analyses in R (version 3.5.2) [2] and made this R script  
84 available on Github ([https://github.com/joelmainland/Taste\\_is\\_king](https://github.com/joelmainland/Taste_is_king)). The data contained ten  
85 variables: *Id* (each review has a unique identifier), *ProductId* (unique identifier for the product),  
86 *UserId* (identifier for the user), *ProfileName* (the self-assigned user name), *HelpfulnessNumerator*  
87 (the number of people who found the review helpful), *HelpfulnessDenominator* (the number of  
88 people who found the review helpful or not), *Score* (rating of the product on a 1 to 5 scale, with  
89 5 being best and 1 being worst), *Time* (time of day the review was submitted), *Summary* (brief  
90 review), and *Text* (full review). The reviews were submitted over a ten-year period ending in  
91 October 2012. There were 568,454 reviews but some were duplicated (same text for similar

92 products) and were removed prior to analysis. Analysis of the de-duplicated data indicated  
93 there were a total of 393,568 reviews of 67,553 products by 256,043 unique reviewers (as defined  
94 by unique reviewer IDs; however, this does not ensure absolute uniqueness because the same  
95 person might have more than one ID. All reviewers were ‘verified purchasers,’ meaning the  
96 online retailer (Amazon) had a record that the reviewer purchased the food item being  
97 reviewed.

98 **Word use analysis.** We used the Word2Vec package to create a vector representation of words  
99 based on the distributional hypothesis, namely that words that appear in the same context share  
100 semantic meaning [3]. Likes and dislikes can arise because of food tastes, textures or odors, cost,  
101 nutrition, or quality of service. Thus, the vector representation was used to identify clusters of  
102 semantically similar words based on seed words from these categories (**Supplementary Table**  
103 **1**). We counted the numbers of reviews that contained words from these clusters. In some cases  
104 we elected not to use individual odor descriptors because odors are often described using the  
105 word for the object producing the odor [4]., e.g., honey smells like honey, peaches smell like  
106 peaches.

107 Building on the results that we explain below, we also probed for more details about sweet  
108 (because it was the most commonly used taste word). We extracted all phrases using the word  
109 ‘sweet’ and cleaned the data by eliminating common but irrelevant uses of the word sweet, e.g.,  
110 ‘sweet potato’. We next extracted 38 phrases that captured the majority of ways sweetness was  
111 discussed, and tallied the number of times the phrase was used, e.g., ‘too sweet’ versus ‘not too  
112 sweet’ and used to calculate the percent of the reviews which contained that phrase. The

113 phrases were placed into one of three categories: oversweet, (e.g., cloying, sickeningly sweet),  
114 under-sweet (e.g., not sweet enough for me) and neutral. We then tabulated the percentage of  
115 comments within each of the three categories.

116 **Polarization.** We extracted all food products that had 50 or more reviews and computed the  
117 standard deviation of the ratings (on the star scale). We refer to the foods with the largest  
118 standard deviation as ‘polarizing’ foods. We chose the top 10 polarizing foods for a more in-  
119 depth analysis. As we mentioned above, each product is identified by a unique ID number. To  
120 find out which foods were associated with which ID number, we automatically extracted data  
121 about the Amazon product page for each ID to obtain the product title. For each of the 10 most  
122 polarizing products, two readers evaluated the narrative portion of each review (*Summary* plus  
123 *Text*) and extracted representative comments about taste.

## 124 **Results**

125 **Overview.** We examined several global categories using seed words: taste and related words,  
126 price and related words, likewise customer service, texture, smell and trigeminal (e.g.,  
127 spiciness). In this analysis, the predominant word used in reviews was ‘taste’ with over 30% of  
128 reviews using this word; fewer than those who mentioned ‘price’ (**Table 1**). To examine  
129 whether this method of generating words was valid, we compared this list of words obtained to  
130 those words used by sensory panels in the food industry to describe texture [5], finding  
131 substantial agreement, e.g., hard, rough. For smell, we elected not to use individual odor  
132 descriptors as seed words because odors are often named for the physical source [4] and we  
133 cannot easily differentiate when the word ‘coffee’ is used as a product description from when it

134 is used to describe an odor. When the results are aggregated over the five categories, the results  
135 show that 'taste' is mentioned more often than texture, customer service, cost, health, smell, and  
136 trigeminal sensations (**Figure 1**). Reviewers mentioned *sweet* far more often than any other taste  
137 quality (10.75%), followed by *bitter* (2.90%), *savory* (0.27%), *sour* (2.10%), and *salty* (1.45%).  
138 *Umami* is a synonym for *savory* but a word that is rarely used by reviewers (0.02%).

139 We also probed in more detail about sweet and sweetness and identified 38 phrases used to  
140 indicate this property. We considered each phrase and its negation, e.g., 'sweet enough' versus  
141 'not sweet enough' and parsed each phrase into one of three categories, over-sweet, under-  
142 sweet or neutral. The results were striking. Almost 1 percent of all reviews, regardless of food  
143 type, used the phrase 'too sweet' indicating that excessive sweetness is often mentioned. When  
144 evaluating the pattern of reviews that mention sweetness, over-sweetness was mentioned more  
145 than 25 times more often than under-sweetness (**Table 2**). See **Supplemental Table 2** for a list of  
146 the 38 phrases, the counts, and percentage of time each phrase was used in all reviews.

147 **Polarizing products.** For this analysis, we excluded products with fewer than 50 reviews,  
148 reducing the number of reviews by roughly half (N=109,698) and the number of products from  
149 67,533 to 908. We computed the standard deviation for each remaining product and ranked the  
150 products from highest to lowest standard deviation. After excluding products not intended for  
151 human consumption (e.g., pet food), we selected the top 10 products (**Table 3**). Standard  
152 deviations ranged from 1.82 (most polarizing) to 0.21 (least polarizing).

153 The top two factors for polarization were (a) formulation changes in which a product initially  
154 liked was changed and got negative reviews and (b) diverse views about the taste of the



155 product. For instance, for formulation change, consumers objected to increases in sugar in a  
156 formerly beloved cereal. Illustrative phrases that highlight the opinion diversity were manually  
157 extracted and are listed in **Table 4**.

## 158 **Discussion**

159 The field of ‘Sensory nutrition’ brings together knowledge and methods from sensory,  
160 physiology and nutrition sciences to understand the key drivers of nutrient choices so that we  
161 can modulate diet to promote human health. Taste is often described as a primary influence on  
162 human food selection and intake in nutrition and biopsychology research, e.g., [6]. Studies such  
163 as the one just referenced rely on data from several thousand people, but here we demonstrate  
164 the primacy of taste among nearly half a million respondents who are unaware of the import of  
165 their commentary, essentially catching consumers responding in an unself-conscious way.  
166 These results demonstrate that when consumers write about food, rather than cost or its  
167 nutritional benefits, they write about taste. Taste is often applied generically to the flavor of  
168 food, which has more inputs from different sensory systems, such as the somatosensory system  
169 (texture) and the olfactory system (smell)[7]. Therefore, these results could be construed broadly  
170 to apply to food flavor, not to taste as narrowly defined by sensory biologists.

171 **Taste qualities.** We learned that *sweet* was the taste quality mentioned most often, almost three  
172 times more often than *bitter*, the next closest word used, followed distantly by *sour* and *salty*.  
173 This result was a surprise because the opinions about bitterness would be complex and worthy  
174 of mention in food product reviews, either as a desirable feature, perhaps in coffee, or an  
175 undesirable feature in foods that do not normally taste bitter. However, perhaps bitterness is so

176 rarely present in commercial foods that it is rarely mentioned. Likewise, it was surprising how  
177 little saltiness was mentioned by reviewers, given the global attention to salt reduction for  
178 health [8]. While the overconsumption of sugar and salt are common public health concerns ([8-  
179 10]), consumers have much more to say about sweetness than saltiness, at least in this particular  
180 venue. We have learned from analysis of the sweet receptor that different versions arise from  
181 inborn genotype, and some people are more sensitive to sweet taste than others because of their  
182 genotype [11-15]. With that point in mind, it is interesting that consumers complained more  
183 about products being ‘too sweet’ rather than ‘not sweet enough’, indicating that the over-  
184 sugaring of processed foods is undesirable for some people and that offering a range of  
185 sweetness of products might be even more important than previously realized.

186 **Polarizing products.** We were also interested in polarizing products—those rated variably by  
187 different reviewers. While reading these reviews, we noted several trends that appeared to  
188 account in part for the polarized ratings. One issue was formulation change—if consumers had  
189 bought a product in the past and been satisfied with it, only to find on repurchasing that the  
190 formulation had changed (e.g., increasing the product’s sugar content), they down-rated the  
191 product. In some ways, these formulation changes muddy the analysis, because the consumers  
192 are rating two different products listed with the same product ID.

193 Often the diversity in viewpoint appeared to arise from different perspectives on a product’s  
194 taste. Some reviewers extolled the desirable taste of a particular product whereas others  
195 disliked it, sometimes going so far as to berate other reviewers for their opinions. One  
196 prominent example was the diversity of viewpoint on product sweetness, which is supported

197 by laboratory-based studies of sweet likers and dislikers, e.g., [16]. Recent studies of personal  
198 differences in the liking of intensely sweetened foods suggest this may be an inborn trait [17]  
199 Smell also contributed to the ratings of a few polarizing foods. There are other long-standing  
200 debates about the desirable odor of some foods, a common Internet trope being the dislike of  
201 cilantro [18, 19]. We also noted that smell figured prominently as a polarizing agent for some  
202 products with a fishy odor, and we wonder whether the inborn variation in the ability to smell  
203 the fishy odor trimethylamine might account for this diversity of viewpoint [20]. Although this  
204 study does not allow us to match genotype to reviewer to understand whether these taste  
205 disagreements owe to genetics, it does suggest that there is polarization and has identified a  
206 handful of products that might be most profitably explored further for genetic effects.

207 **Limitations.** This study has several limitations. It is an analysis of data offered by the online  
208 retailer that are freely available to all via a website that encourages exploratory data analysis of  
209 large data sets (Kaggle). As such, we had no control over the collection of the data, the number  
210 and type of variables included, or the accuracy of the data itself. Thus, all results must be  
211 interpreted with this limitation in mind. Further, additional information such as item category  
212 or other classifiers would have been useful to limit the analysis to only certain types of foods or  
213 to add food type in the analysis. We also learned that foods can have the same identifier but  
214 when the manufacturer changes the formulation (e.g., adds sugar) it may lead to polarization  
215 because people who preferred the previous version of the product are now dissatisfied. This  
216 type of polarization does not arise from diversity of viewpoint about the same food item and  
217 these instances dilute the true polarizing response.

218 A second limitation was the limited choice of words and phrases to count in the reviews, which  
219 capture few instances of related speech. While we used a variety of common phrases to capture  
220 the concept of sweetness (too much or not enough), many reviewers might have used different  
221 words to convey the concept of 'too sweet'. Also, some phrases about sweetness we classified as  
222 'neutral' might be interpreted in one of several ways, e.g., 'on the sweet side'. Capturing the  
223 intended meaning in text strings from real-world situations is imperfect, even using a large  
224 palette of terms to describe a certain situation, and those limitations are present here.

225 Finally, there is an imprecision in the focus on taste, which encompasses several qualities for the  
226 average person [7]. The reviewers can use this word both strictly, to evaluate the taste but not  
227 smell or texture of the product, or more generally as a holistic quality (for example,  
228 '...wonderful smell and flavor makes my coffee syrup taste like hazelnuts...' describes a smell,  
229 but not a taste, and is flagged as both in our analysis). This limitation, the imprecision of the  
230 word 'taste', is offset by the value of capturing real-world perceptions of foods, by people who  
231 can report on whatever features they consider to be most important.

232 **The future.** This first study of food reviews from an on-line retailer, taste and polarizing foods  
233 portends several avenues of the future research in sensory nutrition. Here we analyzed the  
234 content of almost half a million reviews, but it is clearly possible and desirable to perform a  
235 similar study on larger cohort, but one in which other information was available about the  
236 reviewers, such as demographics, e.g., age and sex, other social and demographic information  
237 (e.g., amount of formal education), medical history (e.g., diabetes, hypertension), genotype, and  
238 other biological information, e.g., hormone concentrations in the blood or brain imaging. Large

239 scale studies that make the marketplace a laboratory become technically more possible with the  
240 potential for linking food purchasing information with electronic medical records. While the  
241 social, political and ethical barriers to these types of studies may be insurmountable, studies at  
242 this scale are increasingly technically possible. These studies could reveal previously  
243 overlooked patterns of food consumption and disease and point to new avenues of biology to  
244 explain why people choose the foods they do.

245 **Conclusion.** We learned from these data that, when it comes to commercially available food  
246 products, taste matters and that there are diverse viewpoints about some products that may  
247 stem in part from differences in basic biology. Looking ahead and drawing on the research steps  
248 from the preceding paragraph, it may be possible to find genotypes (for instance, in taste  
249 receptors) that predict who will or will not like the taste of a given product. This idea may  
250 translate into healthier foods, if producers can reduce sugar or salt in ways that appeal to  
251 groups that prefer those products, by linking genetics (taste-related genotypes) to behavior  
252 (food-purchasing habits). This study is a step toward realizing this idea.

253

254

255 Electronic resources

256 <https://www.kaggle.com/snap/amazon-fine-food-reviews>

257 [https://github.com/joelmainland/Taste\\_is\\_king](https://github.com/joelmainland/Taste_is_king)

258

259 **Acknowledgments.** This study was funded by institutional funds from the Monell Chemical  
260 Senses Center. We thank members of R-Club who provided coding and analysis advice: Cailu  
261 Lin, Stephanie Gervasi, Molly Spencer, Steven Brooks, Alissa Nolden, Marissa Karmarck,  
262 Nicolle Murphy, Carolyn Novaleski, Genevieve Bell, and Emily Mayhew. Nancy Rawson  
263 commented on a draft of the manuscript. We thank two anonymous reviewers for their  
264 insightful comments.

265

266 **Table 1:** Word counts by category

| Word      | Count  | Percent | Category         |
|-----------|--------|---------|------------------|
| taste     | 121447 | 30.86   | Taste            |
| price     | 53327  | 13.55   | Price            |
| order     | 52279  | 13.28   | Customer Service |
| sweet     | 42315  | 10.75   | Taste            |
| light     | 27329  | 6.94    | Texture          |
| ship      | 26640  | 6.77    | Customer Service |
| hard      | 23253  | 5.91    | Texture          |
| rough     | 22058  | 5.60    | Texture          |
| healthy   | 19674  | 5.00    | Health           |
| smell     | 17457  | 4.44    | Smell            |
| organic   | 16239  | 4.13    | Health           |
| texture   | 15544  | 3.95    | Texture          |
| diet      | 13514  | 3.43    | Health           |
| fine      | 13475  | 3.42    | Texture          |
| arrived   | 12368  | 3.14    | Customer Service |
| deal      | 12259  | 3.11    | Price            |
| bitter    | 11424  | 2.90    | Taste            |
| cheaper   | 9481   | 2.41    | Price            |
| sour      | 8252   | 2.10    | Taste            |
| value     | 7506   | 1.91    | Price            |
| spicy     | 6945   | 1.76    | Trigeminal       |
| aroma     | 6724   | 1.71    | Smell            |
| salty     | 5688   | 1.45    | Taste            |
| service   | 5613   | 1.43    | Customer Service |
| condition | 5264   | 1.34    | Customer Service |
| sale      | 5053   | 1.28    | Price            |
| healthier | 4375   | 1.11    | Health           |
| safe      | 3941   | 1.00    | Health           |
| bland     | 3889   | 0.99    | Trigeminal       |
| kick      | 3868   | 0.98    | Trigeminal       |
| scent     | 3232   | 0.82    | Smell            |
| fruity    | 2045   | 0.52    | Smell            |
| odor      | 1803   | 0.46    | Smell            |
| tabasco   | 572    | 0.15    | Trigeminal       |
| spiciness | 395    | 0.10    | Trigeminal       |

267 'Trigeminal' refers to the common chemical sense, e.g., burning, stinging, cooling.



268 **Table 2:** Sweet taste phrase use in reviews

| Count | Sweetness | Percent |
|-------|-----------|---------|
| 7230  | Over      | 56.2    |
| 5370  | Neutral   | 41.7    |
| 268   | Under     | 2.1     |

269 'Over' are phrases about excessive sweetness, e.g., 'too sweet'; 'Under' are phrases indicating  
270 the product is not sweet enough. 'Neutral' indicates the item is not either too sweet or not sweet  
271 enough. See Supplemental Table 2 for a list of all tallied sweet-relevant phrases

272

273

274 **Table 3:** Products with the highest standard deviation in rating (polarization)

|    | Product ID | Product name                                       | n   | Mean | SD   |
|----|------------|----------------------------------------------------|-----|------|------|
| 1  | B001M08YZA | Special K Cereal, Protein                          | 109 | 2.83 | 1.82 |
| 2  | B00507A02Q | blk Premium Alkaline Water Infused w/ Fulvic Trace | 126 | 2.84 | 1.78 |
| 3  | B002OMV09W | Ghost Chili Pepper                                 | 58  | 2.90 | 1.77 |
| 4  | B000HDKZKU | Enjoy Life Chewy Bars                              | 68  | 2.75 | 1.77 |
| 5  | B000EM9E2Y | Just the Cheese Popped Cheese, Butter Flavor       | 58  | 2.60 | 1.76 |
| 6  | B000F6SNPS | Good Earth Herbal Tea, Sweet & Spicy               | 143 | 3.69 | 1.76 |
| 7  | B000CRIBCA | High Protein Bars by Think Thin-On the Go          | 69  | 3.07 | 1.76 |
| 8  | B000AQJRWG | Tofu Shirataki Noodles Spaghetti Shape             | 75  | 3.19 | 1.74 |
| 9  | B002CENRLG | Shirataki Noodles                                  | 101 | 3.54 | 1.72 |
| 10 | B002EDEMLY | Red Vines Red Original Licorice Twists             | 77  | 3.69 | 1.73 |

275 n = number of reviews per product. Mean = mean star rating for each product. SD = standard

276 deviation for product ratings.

277

278 **Table 4:** Examples of polarized taste comments about the same product

| Abbreviated Product Name      | Positive Taste                                          | Negative Taste                                                          |
|-------------------------------|---------------------------------------------------------|-------------------------------------------------------------------------|
| Special K Cereal, Protein     | 'taste[s] pretty darn good'                             | 'it tastes totally horrible!!'                                          |
| blk Premium Alkaline Water    | 'it taste[s] just like water with no funny after taste' | 'this stuff tastes like dirty coins'                                    |
| Enjoy Life Chewy Bars         | 'the bars have a good taste'                            | 'tastes like cardboard. zero flavor'                                    |
| Just the Cheese Popped Cheese | 'I think they taste great'                              | 'worst tasting stuff that I have ever eaten'                            |
| Good Earth Herbal Tea         | 'it tastes fantastic'                                   | 'sick with disappointment over degraded and truly unrecognizable taste' |
| High Protein Bars             | 'They taste more like a de[s]sert'                      | 'tastes of a mixture of cardboard and chemicals'                        |
| Tofu Shirataki Noodles        | 'Tastes identical to real pasta'                        | 'gross in tast[e] and texture'                                          |
| Shirataki Noodles             | 'tasted fresh and enticing each time'                   | 'taste like rotten fish'                                                |
| Red Vines                     | 'tasted delicious'                                      | 'they have a horrible after taste'                                      |

## References

- [1] Coldwell, S. E., Mennella, J. A., Duffy, V. B., Pelchat, M. L., Griffith, J. W., Smutzer, G., et al. Gustation assessment using the NIH Toolbox. *Neurology*. 2013,80:S20-4.
- [2] R Core Team. R: A language and environment for statistical computing. In: *Computing RFFS*, editor. Vienna, Austria 2013.
- [3] Mikolov, T., Chen, K., Corrado, G., Dean, J. Efficient Estimation of Word Representations in Vector Space. arXiv:1301.37812013.
- [4] Dravnieks, A., ASTM Committee E-18 on Sensory Evaluation of Materials and Products. Section E-18.04.12 on Odor Profiling. Atlas of odor character profiles. Philadelphia, PA: ASTM; 1985.
- [5] Szczesniak, A. S. Consumer Awareness of Texture and of Other Food Attributes, II. *J Texture Stud*. 1971,2:196-206.
- [6] Glanz, K., Basil, M., Maibach, E., Goldberg, J., Snyder, D. A. N. Why Americans Eat What They Do. *J. Am. Dietetic Assoc*. 1998,98:1118-26.
- [7] Bartoshuk, L. M. Taste, smell and pleasure. The hedonics of taste. Hillsdale, NJ, US: Lawrence Erlbaum Associates, Inc; 1991. p. 15-28.
- [8] World Health Organization. Global action plan for the prevention and control of NCDs 2013-2020. 2013. p. 55.
- [9] World Health Organization. Guideline: Sugars intake for adults and children. Geneva 2015.
- [10] WHO. Diet, nutrition and the prevention of chronic diseases. In: WHO/FAO, editor.: World Health Organization; 2003.
- [11] Fushan, A. A., Simons, C. T., Slack, J. P., Drayna, D. Association between common variation in genes encoding sweet taste signaling components and human sucrose perception. *Chem Senses*. 2010,35:579-92.
- [12] Fushan, A. A., Simons, C. T., Slack, J. P., Manichaikul, A., Drayna, D. Allelic polymorphism within the TAS1R3 promoter is associated with human taste sensitivity to sucrose. *Curr Biol*. 2009,19:1288-93.
- [13] Joseph, P. V., Reed, D. R., Mennella, J. A. Individual differences among children in sucrose detection thresholds: Relationship with age, gender, and bitter taste genotype. *Nurs Res*. 2016,65:3-12.
- [14] Mennella, J. A., Finkbeiner, S., Reed, D. R. The proof is in the pudding: children prefer lower fat but higher sugar than do mothers. *Int. J. Obesity*. 2012,36:1285-91.
- [15] Mennella, J. A., Reed, D. R., Mathew, P. S., Roberts, K. M., Mansfield, C. J. 'A spoonful of sugar helps the medicine go down': bitter masking by sucrose among children and adults. *Chem Senses*. 2015,40:17-25.
- [16] Looy, H., Callaghan, S., Weingarten, H. P. Hedonic response of sucrose likers and dislikers to other gustatory stimuli. *Physiol Behav*. 1992,52:219-25.
- [17] Hwang, L. D., Lin, C., Gharahkhani, P., Cuellar-Partida, G., Ong, J. S., An, J., et al. New insight into human sweet taste: a genome-wide association study of the perception and intake of sweet substances. *Am J Clin Nutr*. 2019.
- [18] Tullo, A. Vile weed or essential ingredient? *Chemical and Engineering News*. 2010,88:72.
- [19] Eriksson, N., Wu, S., Do, C. B., Kiefer, A. K., Tung, J. Y., Mountain, J. L., et al. A genetic variant near olfactory receptor genes influences cilantro preference . 2012.

[20] Amoore, J. E., Forrester, L. J. Specific anosmia to trimethylamine: the fishy primary odor. *J Chem Ecol.* 1976,2:49-56.

**Supplemental Table 1.** Word list from Word2Vec analysis

| Word        | Count  | Percent | Category |
|-------------|--------|---------|----------|
| taste       | 121447 | 30.86   | Taste    |
| sweet       | 42315  | 10.75   | Taste    |
| bitter      | 11424  | 2.9     | Taste    |
| sour        | 8252   | 2.1     | Taste    |
| salty       | 5688   | 1.45    | Taste    |
| sugary      | 1830   | 0.46    | Taste    |
| acidic      | 1194   | 0.3     | Taste    |
| savory      | 1075   | 0.27    | Taste    |
| metallic    | 527    | 0.13    | Taste    |
| umami       | 69     | 0.02    | Taste    |
| light       | 27329  | 6.94    | Texture  |
| hard        | 23253  | 5.91    | Texture  |
| rough       | 22058  | 5.6     | Texture  |
| texture     | 15544  | 3.95    | Texture  |
| fine        | 13475  | 3.42    | Texture  |
| smooth      | 12998  | 3.3     | Texture  |
| dry         | 12500  | 3.18    | Texture  |
| soft        | 10871  | 2.76    | Texture  |
| lean        | 9714   | 2.47    | Texture  |
| thick       | 7028   | 1.79    | Texture  |
| crunchy     | 6492   | 1.65    | Texture  |
| moist       | 5318   | 1.35    | Texture  |
| chewy       | 5250   | 1.33    | Texture  |
| creamy      | 4742   | 1.2     | Texture  |
| consistency | 4345   | 1.1     | Texture  |
| heavy       | 3451   | 0.88    | Texture  |
| firm        | 2547   | 0.65    | Texture  |
| wet         | 2541   | 0.65    | Texture  |
| airy        | 2517   | 0.64    | Texture  |
| tough       | 1960   | 0.5     | Texture  |
| tender      | 1730   | 0.44    | Texture  |
| dense       | 1681   | 0.43    | Texture  |
| gummy       | 1666   | 0.42    | Texture  |
| delicate    | 1597   | 0.41    | Texture  |
| oily        | 1557   | 0.4     | Texture  |
| greasy      | 1552   | 0.39    | Texture  |
| watery      | 1545   | 0.39    | Texture  |

|            |       |       |                  |
|------------|-------|-------|------------------|
| mushy      | 1264  | 0.32  | Texture          |
| sounds     | 1234  | 0.31  | Texture          |
| crumbly    | 1017  | 0.26  | Texture          |
| grainy     | 1006  | 0.26  | Texture          |
| soggy      | 980   | 0.25  | Texture          |
| fluffy     | 978   | 0.25  | Texture          |
| gooey      | 971   | 0.25  | Texture          |
| melts      | 930   | 0.24  | Texture          |
| gritty     | 924   | 0.23  | Texture          |
| juicy      | 772   | 0.2   | Texture          |
| chunky     | 763   | 0.19  | Texture          |
| runny      | 739   | 0.19  | Texture          |
| silky      | 618   | 0.16  | Texture          |
| brittle    | 531   | 0.13  | Texture          |
| chalky     | 508   | 0.13  | Texture          |
| glue       | 505   | 0.13  | Texture          |
| powdery    | 462   | 0.12  | Texture          |
| rubbery    | 427   | 0.11  | Texture          |
| biting     | 419   | 0.11  | Texture          |
| slimy      | 347   | 0.09  | Texture          |
| flaky      | 343   | 0.09  | Texture          |
| noise      | 325   | 0.08  | Texture          |
| lumpy      | 317   | 0.08  | Texture          |
| pasty      | 221   | 0.06  | Texture          |
| crispness  | 154   | 0.04  | Texture          |
| slippery   | 148   | 0.04  | Texture          |
| stringy    | 141   | 0.04  | Texture          |
| puffy      | 137   | 0.03  | Texture          |
| slick      | 115   | 0.03  | Texture          |
| pulpy      | 51    | 0.01  | Texture          |
| binding    | 37    | 0.01  | Texture          |
| crackling  | 32    | 0.01  | Texture          |
| crispy     | 18    | 0     | Texture          |
| feathery   | 7     | 0     | Texture          |
| sponginess | 3     | 0     | Texture          |
| squashy    | 1     | 0     | Texture          |
| order      | 52279 | 13.28 | Customer Service |
| ship       | 26640 | 6.77  | Customer Service |
| arrived    | 12368 | 3.14  | Customer Service |

|            |       |       |                  |
|------------|-------|-------|------------------|
| service    | 5613  | 1.43  | Customer Service |
| condition  | 5264  | 1.34  | Customer Service |
| seller     | 4346  | 1.1   | Customer Service |
| broken     | 3776  | 0.96  | Customer Service |
| vendor     | 2018  | 0.51  | Customer Service |
| refund     | 1994  | 0.51  | Customer Service |
| promptly   | 1543  | 0.39  | Customer Service |
| damaged    | 1497  | 0.38  | Customer Service |
| timely     | 1369  | 0.35  | Customer Service |
| expired    | 722   | 0.18  | Customer Service |
| refunded   | 393   | 0.1   | Customer Service |
| fulfilled  | 159   | 0.04  | Customer Service |
| price      | 53327 | 13.55 | Price            |
| deal       | 12259 | 3.11  | Price            |
| cheaper    | 9481  | 2.41  | Price            |
| value      | 7506  | 1.91  | Price            |
| sale       | 5053  | 1.28  | Price            |
| pricey     | 3343  | 0.85  | Price            |
| offers     | 1630  | 0.41  | Price            |
| discount   | 1623  | 0.41  | Price            |
| bargain    | 1461  | 0.37  | Price            |
| pricing    | 1131  | 0.29  | Price            |
| savings    | 986   | 0.25  | Price            |
| healthy    | 19674 | 5     | Health           |
| organic    | 16239 | 4.13  | Health           |
| diet       | 13514 | 3.43  | Health           |
| healthier  | 4375  | 1.11  | Health           |
| safe       | 3941  | 1     | Health           |
| vitamins   | 2665  | 0.68  | Health           |
| nutritious | 2027  | 0.52  | Health           |
| nutrients  | 1252  | 0.32  | Health           |
| wholesome  | 984   | 0.25  | Health           |
| unhealthy  | 844   | 0.21  | Health           |
| harmful    | 499   | 0.13  | Health           |
| smell      | 17457 | 4.44  | Smell            |
| aroma      | 6724  | 1.71  | Smell            |
| scent      | 3232  | 0.82  | Smell            |
| fruity     | 2045  | 0.52  | Smell            |
| odor       | 1803  | 0.46  | Smell            |



|           |      |      |            |
|-----------|------|------|------------|
| burnt     | 1410 | 0.36 | Smell      |
| jasmine   | 982  | 0.25 | Smell      |
| fragrance | 892  | 0.23 | Smell      |
| smoky     | 743  | 0.19 | Smell      |
| minty     | 646  | 0.16 | Smell      |
| chocolaty | 496  | 0.13 | Smell      |
| chamomile | 490  | 0.12 | Smell      |
| spearmint | 485  | 0.12 | Smell      |
| spicy     | 6945 | 1.76 | Trigeminal |
| bland     | 3889 | 0.99 | Trigeminal |
| kick      | 3868 | 0.98 | Trigeminal |
| tabasco   | 572  | 0.15 | Trigeminal |
| spiciness | 395  | 0.1  | Trigeminal |

**Supplemental Table 2: Sweet phrases**

| Phrase                          | Count | Percent | Type    |
|---------------------------------|-------|---------|---------|
| not very sweet                  | 163   | 0.04    | Under   |
| not sweet enough                | 94    | 0.02    | Under   |
| not sweet enough for me         | 11    | 0       | Under   |
| too sweet                       | 3121  | 0.79    | Over    |
| very sweet                      | 1297  | 0.33    | Over    |
| to sweet                        | 1020  | 0.26    | Over    |
| overly sweet                    | 616   | 0.16    | Over    |
| so sweet                        | 378   | 0.1     | Over    |
| really sweet                    | 230   | 0.06    | Over    |
| sickly sweet                    | 141   | 0.04    | Over    |
| sickeningly sweet               | 114   | 0.03    | Over    |
| cloyingly sweet                 | 108   | 0.03    | Over    |
| pretty sweet                    | 106   | 0.03    | Over    |
| overwhelmingly sweet            | 38    | 0.01    | Over    |
| excessively sweet               | 21    | 0.01    | Over    |
| overpoweringly sweet            | 20    | 0.01    | Over    |
| disgustingly sweet              | 13    | 0       | Over    |
| ultra sweet                     | 6     | 0       | Over    |
| couldn't stand how sweet it was | 1     | 0       | Over    |
| not too sweet                   | 2550  | 0.65    | Neutral |
| slightly sweet                  | 855   | 0.22    | Neutral |
| not overly sweet                | 700   | 0.18    | Neutral |
| sweet enough                    | 644   | 0.16    | Neutral |
| on the sweet side               | 212   | 0.05    | Neutral |
| not to sweet                    | 135   | 0.03    | Neutral |
| not so sweet                    | 83    | 0.02    | Neutral |
| sweet enough for me             | 36    | 0.01    | Neutral |
| not overwhelmingly sweet        | 28    | 0.01    | Neutral |
| not cloyingly sweet             | 27    | 0.01    | Neutral |
| not sickly sweet                | 26    | 0.01    | Neutral |
| not sickeningly sweet           | 22    | 0.01    | Neutral |
| not overpoweringly sweet        | 18    | 0       | Neutral |
| not really sweet                | 15    | 0       | Neutral |
| not excessively sweet           | 10    | 0       | Neutral |
| not disgustingly sweet          | 4     | 0       | Neutral |
| sweet as i would prefer         | 2     | 0       | Neutral |
| not ultra sweet                 | 2     | 0       | Neutral |

|                       |   |   |         |
|-----------------------|---|---|---------|
| not on the sweet side | 1 | 0 | Neutral |
|-----------------------|---|---|---------|

The count refers to the number of reviews that contain the relevant phrase and the percent of all reviews that contain that phrase. Type refers to undersweetness, oversweetness or neutral comments.

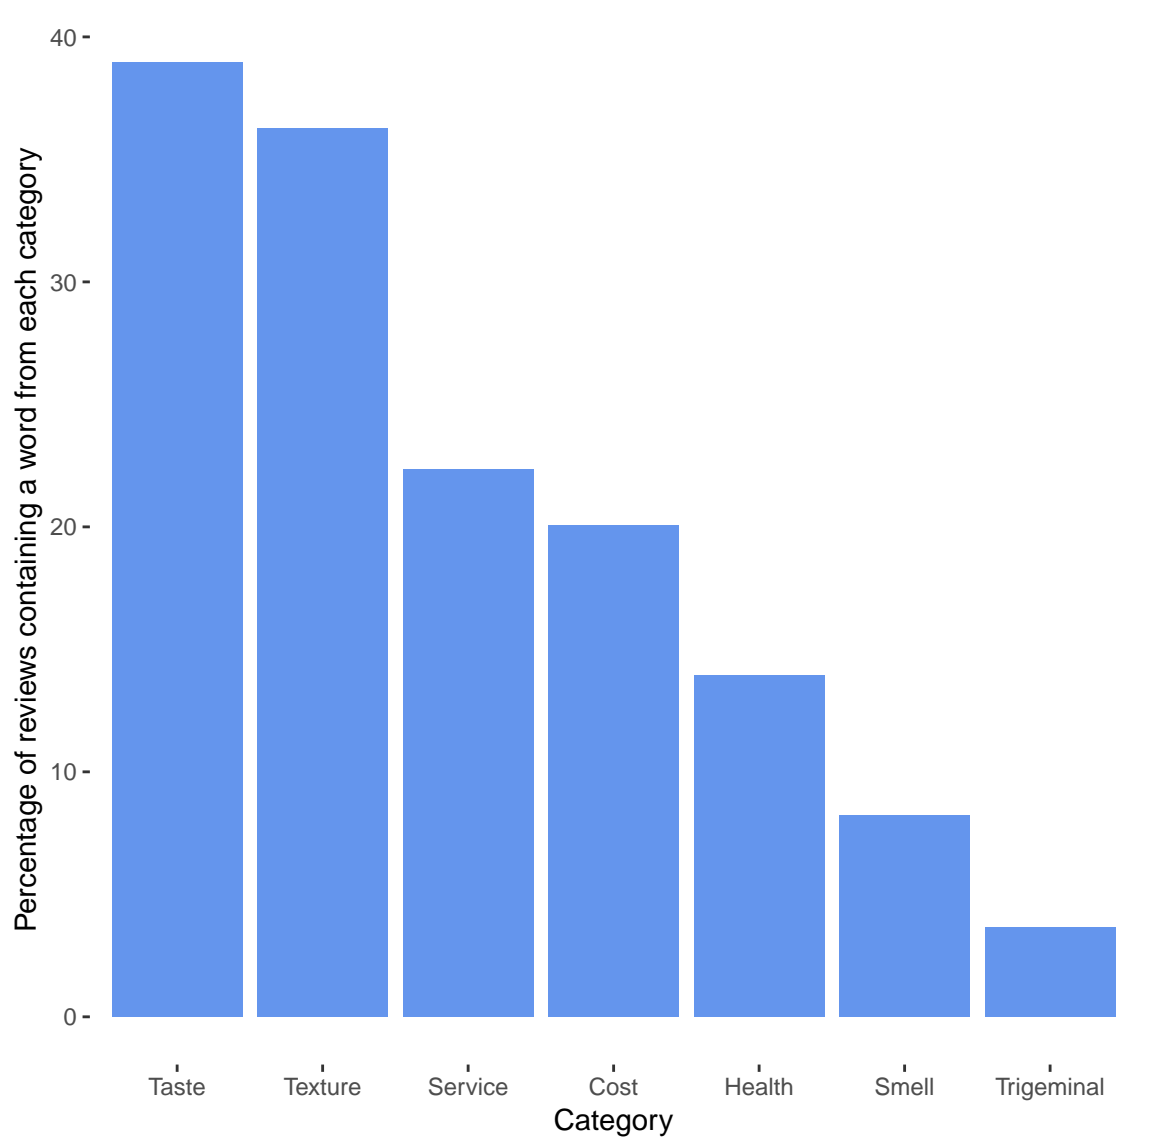

Source: https://www.biorxiv.org/content/10.1101/662585.full.pdf
